# Supplementary material for: QS ENDO Real – A Study by the German Endometriosis Research Foundation (SEF) on the Reality of Care for Patients with Endometriosis in Germany, Austria and Switzerland
Source: PubMed Central journal article supplement — Geburtshilfe Frauenheilkd. 2020 Feb 21;80(2):179–89. doi: 10.1055/a-1068-9260 (PMC7035138; doi:10.1055/a-1068-9260), 2020-02-21
Supplement: 10-1055-a-1068-9260-sup.pdf [file 10-1055-a-1068-9260-sup.pdf]

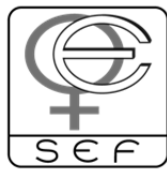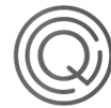

# Versorgungsrealität von Endometriosepatientinnen in Deutschland

Eine Qualitätssicherungsinitiative der Stiftung Endometriose-Forschung

## Erhebungsbogen QS ENDO Real

### Kontaktdaten · Zentrum (bitte ergänzen bzw. korrigieren)

Einrichtung: \_\_\_\_\_

Ort: \_\_\_\_\_

Ansprechpartner: \_\_\_\_\_

E-Mail: \_\_\_\_\_

Stempel

(bitte bis spätestens 16.01.2017 an MMF GmbH, Fax 0231 / 398190-25)

### Angaben zu Ihrer Einrichtung

- Versorgungsstufe:
- Universitätsklinikum
  - Krankenhaus der Maximal- oder Zentralversorgung
  - Krankenhaus der Schwerpunktversorgung
  - Krankenhaus der Grund- oder Regelversorgung
  - Belegklinik

- Gibt es vor Ort Möglichkeiten der Kooperation mit folgenden Disziplinen/ Einrichtungen?
- Chirurgie
  - Urologie
  - Pathologie
  - Radiologie mit CT/MRT
  - Psychosomatik
  - Reproduktionsmedizin
  - Schmerztherapie
  - Rehabilitationsklinik

Gibt es die Möglichkeit, Endometriosepatientinnen ambulant zu sehen?  ja  nein

Wieviele Endometrioseerstkontakte sehen Sie ambulant pro Monat?  0 bis 5  6-15  über 15

Gibt es eine Endometriose-Sprechstunde?  ja  nein

Sind Sie ein SEF-zertifiziertes Endometriosezentrum?  ja  nein

Gibt es weitere zertifizierte Zentren an Ihrer Abteilung (z. B. Brustzentrum)?  ja  nein

Wieviele Operationen führen Sie wegen Endometriose pro Jahr durch?  0 bis 50  50-100  über 100  
davon laparoskopisch: ca. |\_\_|\_\_|\_\_| %

Wieviele histologisch gesicherte Endometriose-Diagnosen werden in Ihrer Abteilung pro Jahr gestellt? |\_\_|\_\_|\_\_|

Hat ein Mitarbeiter Ihrer Abteilung in den letzten zwei Jahren an einer Endometriosefortbildung teilgenommen?  ja  nein

Empfinden Sie die Endometriose-Leitlinie als hilfreich bei der Diagnostik und Behandlung der Endometriosepatientinnen?

sehr hilfreich  
 hilfreich  
 neutral  
 wenig hilfreich  
 nicht hilfreich  
 kenne ich nicht

Wie bewerten Sie folgende anamnetische Fragen im Rahmen der Endometrioseabklärung?

|                           | sehr wichtig             | wichtig                  | neutral                  | weniger wichtig          | unwichtig                |
|---------------------------|--------------------------|--------------------------|--------------------------|--------------------------|--------------------------|
| Unterbauchschmerzen       | <input type="checkbox"/> |
| Dysmenorrhoe              | <input type="checkbox"/> |
| Dyschezie                 | <input type="checkbox"/> |
| Algurie                   | <input type="checkbox"/> |
| stellungsabh. Dyspareunie | <input type="checkbox"/> |

Wie beurteilen Sie folgende Schritte der klinischen Untersuchung bei Endometriosepatientinnen?

|                                         | unbedingt erforderlich   | wünschenswert            | neutral                  | weniger wichtig          | nicht erforderlich       |
|-----------------------------------------|--------------------------|--------------------------|--------------------------|--------------------------|--------------------------|
| Spekulumeinstellung der hinteren Fornix | <input type="checkbox"/> |
| bimanuelle Palpation                    | <input type="checkbox"/> |
| Rektale Untersuchung                    | <input type="checkbox"/> |
| TVS                                     | <input type="checkbox"/> |
| Nierensonographie                       | <input type="checkbox"/> |

Untersucht der Operateur die Endometriosepatientin zur Operationsindikation?  ja  nein

Hat ein Mitarbeiter Ihrer Abteilung ein Zertifikat für minimal invasive Chirurgie?  MIC  ESHRE  ESGE  
 andere: \_\_\_\_\_

Welche Klassifikation der Endometriosebefunde wenden Sie nach der Operation an?  rASRM  Enzian  
 reine Deskription des Befundes  
 andere: \_\_\_\_\_

Entnehmen Sie routinemäßig bei reiner Peritonealendometriose eine Biopsie zur histologischen Sicherung?  ja  nein

Wie gehen Sie vor, wenn ein ausgeprägter Endometriosebefund saniert werden soll?

- primäre Weiterleitung an ein Endometriosezentrum
- Teilsanierung oder operative Diagnosesicherung und Weiterleitung an ein Endometriosezentrum
- Teilsanierung und anschließende endokrine Therapie
- Interdisziplinäre Resektion an Ihrer Klinik

Wird eine Behandlungsempfehlung mit der Patientin besprochen?  ja  nein

Wird eine Behandlungsempfehlung im Arztbrief/ OP-Bericht dokumentiert?  ja  nein

Wird die von Ihnen verwandte Klassifikation der Endometriose im Arztbrief dokumentiert?  ja  nein
